# Supplementary material for: Simple generation of hairless mice for in vivo imaging
Source: PubMed Central journal article supplement — Exp Anim. 2017 Jul 18;66(4):437–45. doi: 10.1538/expanim.17-0049 (PMC5682356; doi:10.1538/expanim.17-0049), 2017-07-18
Supplement: expanim-66-437-s001.pdf [file expanim-66-437-s001.pdf]

**Supplementary Figure 1.** Transfection of *pX330-Hr51* vector.

The cleavage activity of *pX330-Hr51* was examined by traffic reporter system for checking CRISPR activity (10).

(A) The CRISPR target sequence including PAM was inserted between *tdsRed* and first EGFP fragments in *p2color*. This plasmid was designated as *p2color-Hr51*. As the reading frames of the first and second EGFP fragments were different, only *tdsRed* was translated from *p2color* vector. Double-strand break (DSB) by CRISPR/Cas9 from *pX330* in *p2color*, and frameshift occurred often through the non-homologous end joining (NHEJ) pathway. Accordingly, first or second EGFP reading frame mutation occurred. (B) Although only *tdsRed* fluorescence signal was observed in *p2color-Hr51*-transfected HEK293T cells, both *tdsRed* and EGFP signals were observed in cells co-transfected with *p2color-Hr51* and *pX330-Hr51*. Scale bar: 200  $\mu\text{m}$ .

**Supplementary Figure 2.** Temporal changes in male *Hr<sup>em1Utr/em1Utr</sup>* and *Hr<sup>hr/hr</sup>* mice.

(A) Male *Hr<sup>em1Utr/em1Utr</sup>* mice lost ventral hair at 4 weeks of age. After 6 weeks of age, they gradually lost dorsal hair. (B) Male and (C) female *Hr<sup>hr/hr</sup>* mice lost hair around the eyes at 2 weeks of age, and they gradually lost hair from head to tail. They were completely hairless at 4 weeks of age.

**Supplementary Figure 3.** Body weights of wild-type and  $Hr^{em1Utr/em1Utr}$  mice.

We compared the body weights of wild-type and  $Hr^{em1Utr/em1Utr}$  mice from 4 to 10 weeks of age. Body weights of wild-type and  $Hr^{em1Utr/em1Utr}$  mice at 5 and 6 weeks of age were significantly different.

**Supplementary Figure 4.** Amino acids of normal and mutated *Hr* gene.

(A) Schematic for length of amino acid. Red letter (M) and sign (@) indicate start codon and stop codon, respectively. Blue sign (&) indicates first stop codon after mutation. Orange letter (M) indicates the predicted first start codon after the mutation. The white arrow indicates the region of mutation. The Length of normal, mutated, and N-terminal truncated amino acid is indicated, respectively. (B) Amino acid sequence of *Hr* gene. Red letter (M) and sign (@) indicate start codon and stop codon, respectively. Orange letter (M) indicates the predicted first start codon after the mutation.

Supplementary Figure 1. Transfection of *pX330-Hr51* vector.

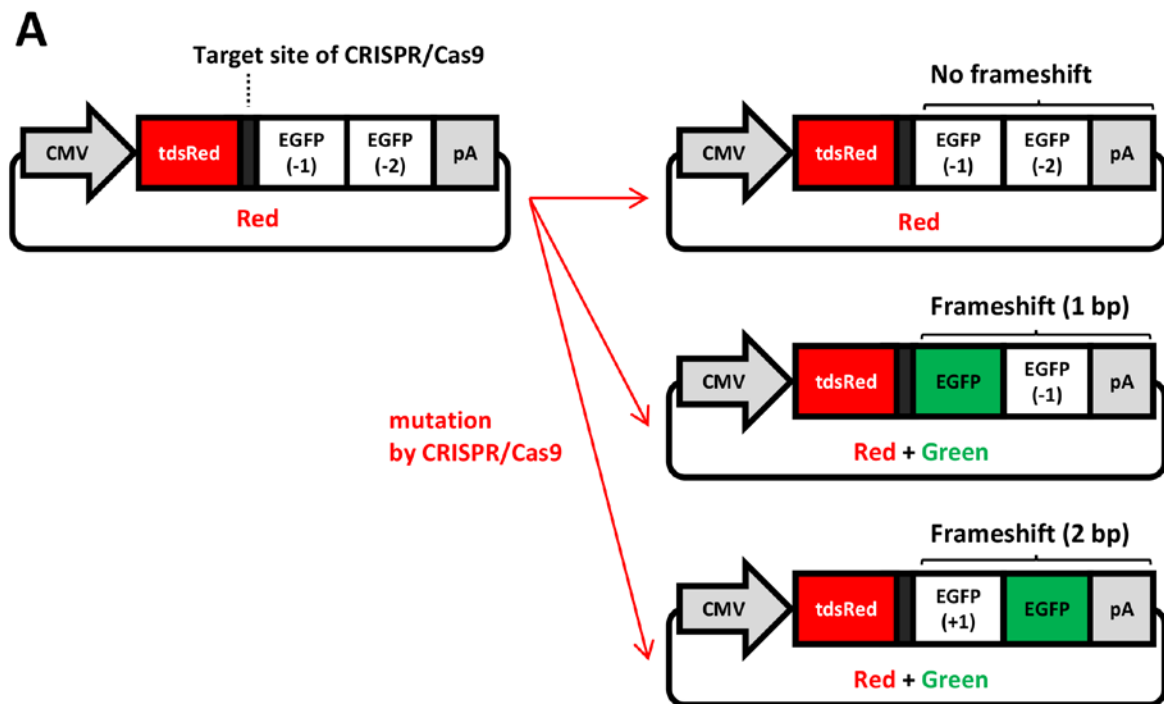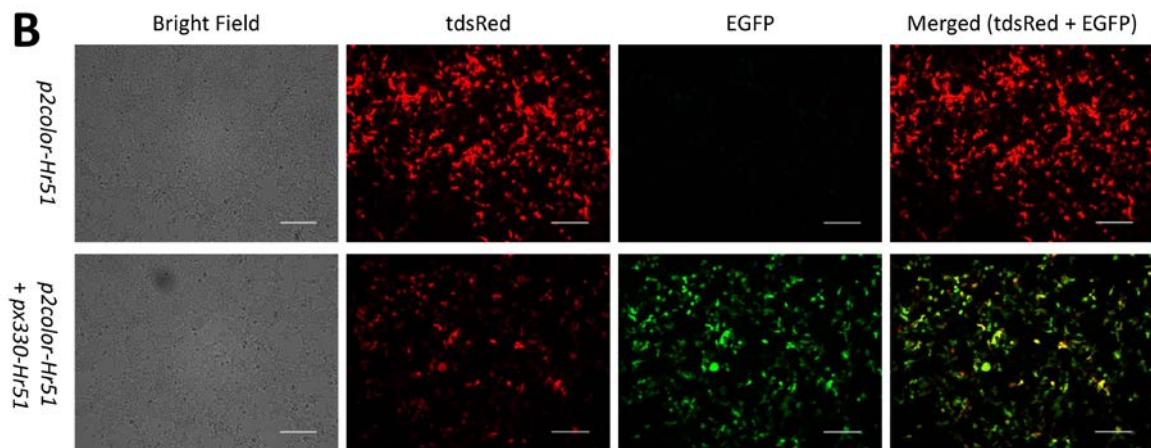

Supplementary Figure 2. Temporal changes in male  $Hr^{em1Utr/em1Utr}$  and  $Hr^{hr/hr}$  mice.

**A** Male  $Hr^{em1Utr/em1Utr}$  mice

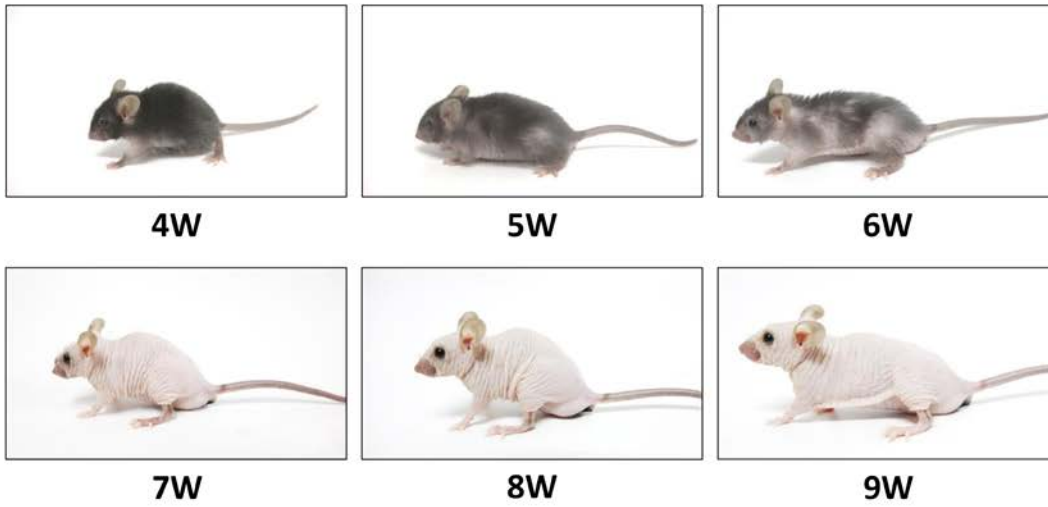

**B** Male  $Hr^{hr/hr}$  mice

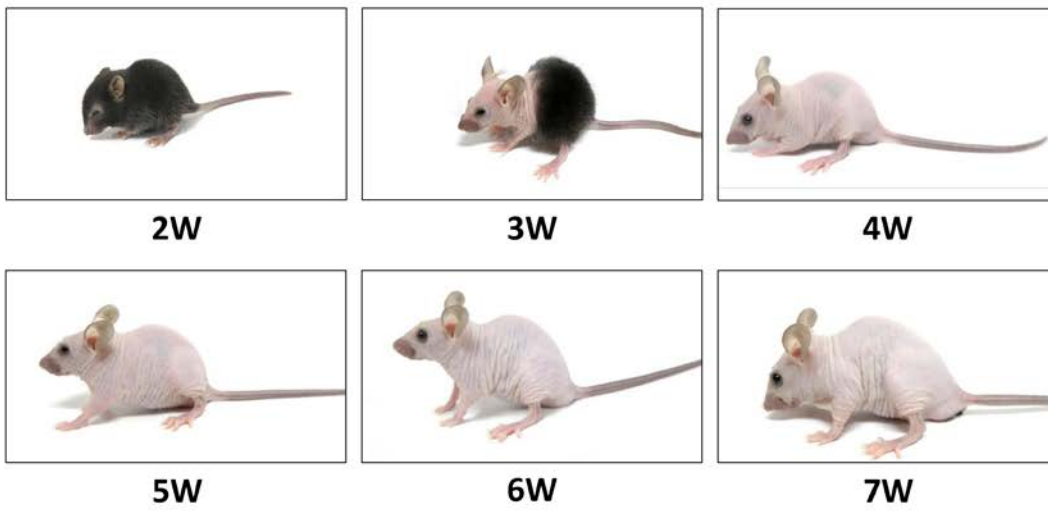

**C** Female  $Hr^{hr/hr}$  mice

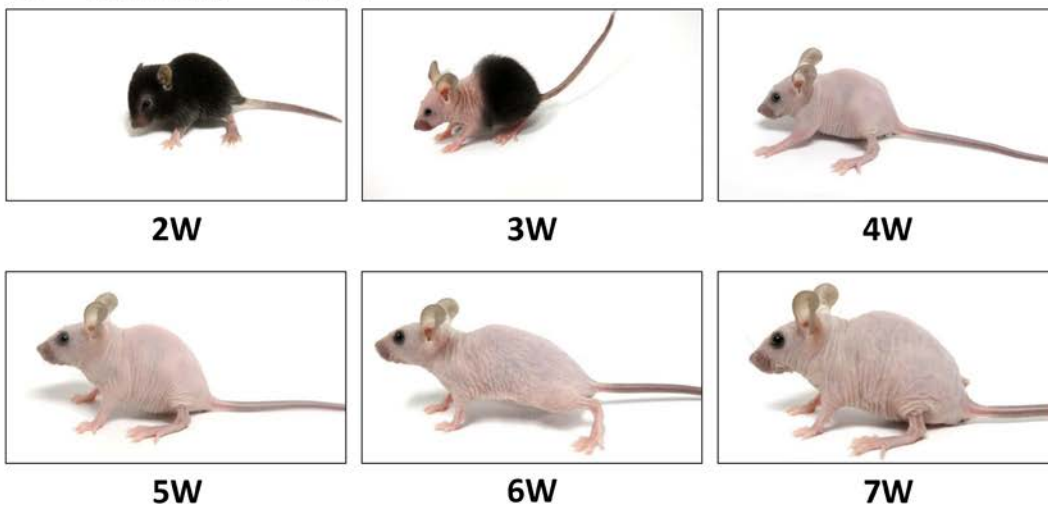

**Supplementary Figure 3.** Body weights of wild-type and *Hr<sup>em1Utr/em1Utr</sup>* mice.

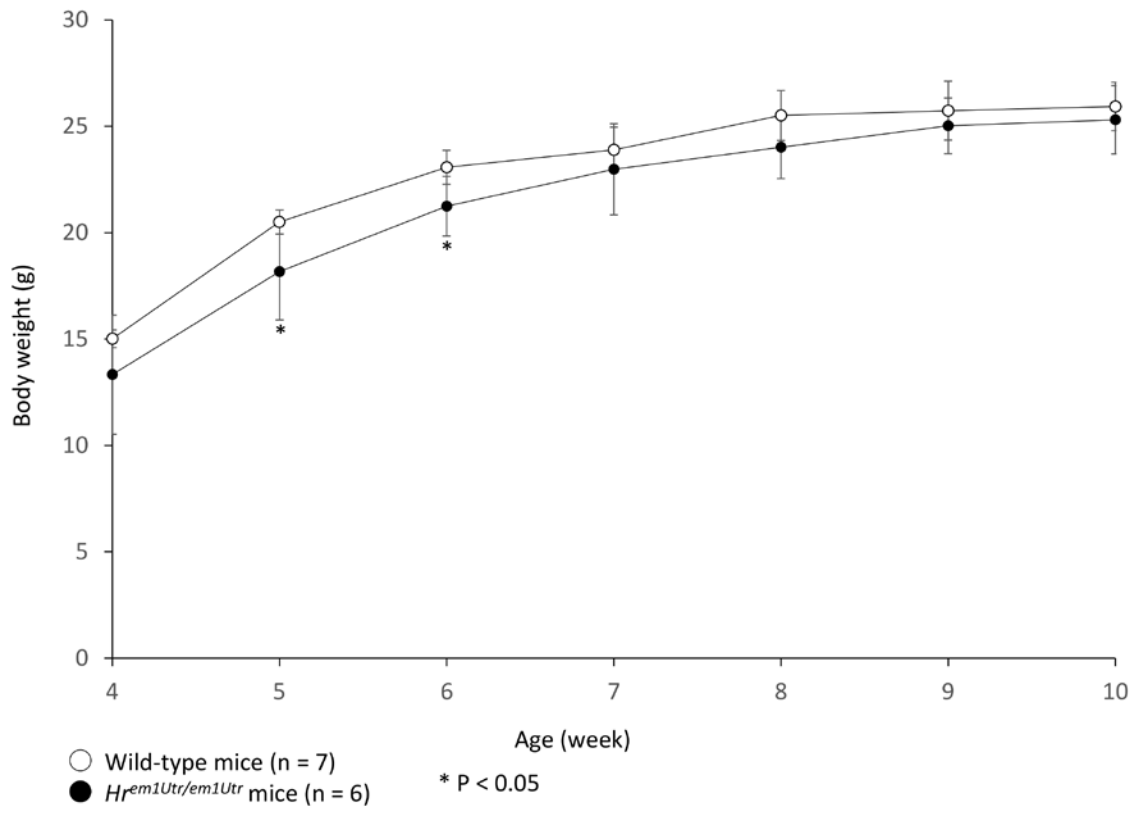

**Supplementary Figure 4.** Amino acids of normal and mutated *Hr* gene.

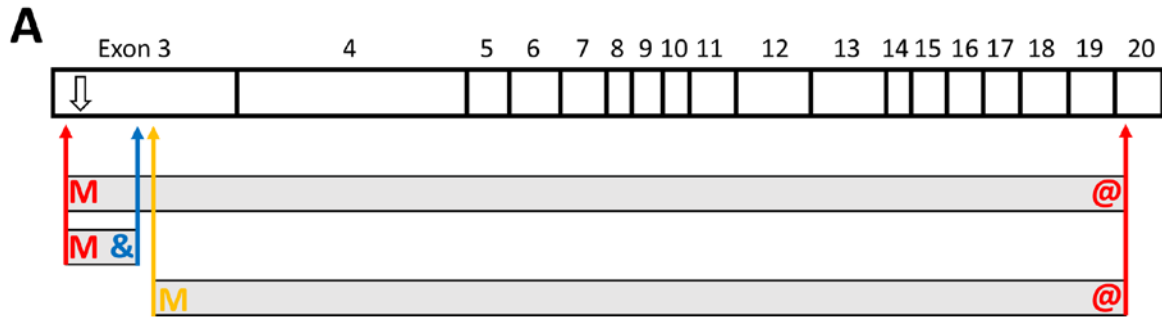

**B**

Amino acid sequence of *Hr* gene

```

M E S M P S F L K D T P A W E K T A P V N G I V G Q E P G T S P Q D G L R H G A L C L G E P A P F W R G V L S T P D S W L P P G F L Q G P K D T L S L V E G E G P R N G E R K G S W L G
G K E G L R W K E A M L A H P L A F C G P A C P P R Y G L I P E H S G G H P K S D P V A F R P L H C P F L L E T K I L E R A P F W V P T C L P P Y L M S S L P P E R P Y D W P L A P N P W V
Y S G S Q P K V P S A F L G S K G F Y H K D P N I L R P A K E P L A E S G M L G L A P G G H L Q Q A C E S E G P S L H Q R D G E T G A G R Q Q N L C P V F L G Y P D T V P R A P W P S C P
P G L V H S L G N I W A G P G S N S L G Y Q L G P P A T P R C P S P G P P T P P G G C C S S H L P A R E G D L G P C R K C Q D S P E G G S S G P G E S S E E R N K A D S R A C P P S H H T K L
K K T W L T R H S E Q F E C P G G C S G K E E S P A T G L R A L K R A G S P E V Q G A S R G P A P K R P S H P F P G T G R Q G A R A W Q E T P E T I I G S K A E A E Q Q E E Q R G P R D G R
I R L Q E S R L V D T S C Q H H L A G V T Q C Q S C V Q A A G E V G V L T G H S Q K S R R S P L E E K Q L E E E D S S A T S E E G G G G P G P E A S L N K G L A K H L L S G L D R L C R L L R
K E R E A L A W A Q R E G Q G P A M T E D S P G I P H C C S R C H H G L F N T H W R C S H C S H R L C V A C G R I A G A G K N R E K T G S Q E Q H T D D C A Q E A G H A A C S L I L T Q
F V S S Q A L A E L S T V M H Q V W A K F D I R G H C F C Q V D A R V W A P G D G G Q Q K E P T E K T P P T P Q P S C N G D S N R T K D I K E E T P D S T E S P A E D G A G R S P L P C P S
L C E L L A S T A V K L C L G H D R I H M A F A P V T P A L P S D D R I T N I L D S I I A Q V V E R K I Q E K A L G P G L R A G S G L R K G L S L P L S P V R T R L S P P G A L L W L Q E P R P K H G
F H L F Q E H W R Q G Q P V L V S G I Q K T L R L S L W G M E A L G T L G G Q V Q T L T A L G P P Q P T N L D S T A F W E G F S H P E T R P K L D E G S V L L H R T L G D K D A S R V Q N
L A S S L P L P E Y C A H Q G K L N L A S Y L P L G L T L H P L E P Q L W A A Y G V N S H R G H L G T K N L C V E V S D L I S I L V H A E A Q L P P W Y R A Q K D F L S G L D G E G L W S P G S
Q T S T V W H V F R A Q D A Q R I R R F L Q M V C P A G A G T L E P G A P G S C Y L D A G L R R R L R E E W G V S C W T L L Q A P G E A V L V P A G A P H Q V Q G L V S T I S V T Q H F L
S P E T S A S A Q L Y H Q G A S L P P D H R M L Y A Q M D R A V F Q A V K A A V G A L Q E A K @
    
```

**Supplementary Table 1.** List of primers used in this study

| Primer for detecting mutations            | Primer sequence (5'- to 3') |
|-------------------------------------------|-----------------------------|
| <i>Cas9</i> detection primer F            | AGTTCATCAAGCCCATCCTG        |
| <i>Cas9</i> detection primer R            | GAAGTTTCTGTTGGCGAAGC        |
| Primer for detecting mutations            | Primer sequence (5'- to 3') |
| detection primer of MultiNA F             | GGCAGGAGAGTGATGGAGAG        |
| detection primer of MultiNA R             | GAGCAGGTTCTCCTAGGCACAG      |
| <i>Hr</i> exon3 genotyping F              | CATTCAGATAGGGGCCAGAA        |
| <i>Hr</i> exon3 genotyping R              | ACAGGGTCACTCTTGGGATG        |
| Primer for analyzing off-targets          | Primer sequence (5'- to 3') |
| Off-target 1 detection primer F           | GCATGCCCCCTGTATTTATG        |
| Off-target 1 detection primer R           | TTCCAGGTCTCCATTGCTTC        |
| Off-target 2 detection primer F           | GCACACACACACACACCTCA        |
| Off-target 2 detection primer R           | TTGCCACTCACCATCAACTC        |
| Primer for reverse transcription (RT) PCR | Primer sequence (5'- to 3') |
| <i>Hr</i> exon3-4 RT primer F             | ATGAGGGCAGGAGAGTGATG        |
| <i>Hr</i> exon3-4 RT primer R             | AAGTGAGGGGCCTTCTGATT        |
| <i>Hr</i> exon7-12 RT primer F            | ACCACGACTCTTCAACACC         |
| <i>Hr</i> exon7-12 RT primer R            | TGCTGTCCAGGATGTTGGTA        |
| <i>Hr</i> exon13-19 RT primer F           | AGCATTCTGGGAGGGATTCT        |
| <i>Hr</i> exon13-19 RT primer R           | GGCATAAAGCATACGGTGGT        |

**Supplementary Table 2.** Hematology

|                                   | Wild-type mice (n=12) | <i>Hr<sup>em1Utr/em1Utr</sup></i> mice (n=12) |
|-----------------------------------|-----------------------|-----------------------------------------------|
| WBC ( $\times 10^2/\mu\text{l}$ ) | 33.7 $\pm$ 10.5       | 28.8 $\pm$ 9.7                                |
| RBC ( $\times 10^4/\mu\text{l}$ ) | 705.0 $\pm$ 157.4     | 925.7 $\pm$ 55.5*                             |
| HGB (g/dl)                        | 11.0 $\pm$ 2.3        | 14.4 $\pm$ 1.0*                               |
| HCT (%)                           | 34.0 $\pm$ 6.9        | 45.8 $\pm$ 3.1*                               |
| MCV (fl)                          | 47.9 $\pm$ 1.0        | 49.4 $\pm$ 0.7*                               |
| MCH (pg)                          | 15.5 $\pm$ 0.4        | 15.6 $\pm$ 0.3                                |
| MCHC (g/dl)                       | 32.2 $\pm$ 0.5        | 31.5 $\pm$ 0.3*                               |
| PLT ( $\times 10^4/\mu\text{l}$ ) | 59.5 $\pm$ 21.3       | 55.5 $\pm$ 13.9                               |

Values are given as mean  $\pm$  SD

\* P<0.05 compared with wild-type mice



**Supplementary Table 3.** Blood chemistry

|                                  | Wild-type mice (n=7) | <i>Hr<sup>em1Utr/em1Utr</sup></i> mice (n=7) |
|----------------------------------|----------------------|----------------------------------------------|
| Aspartate aminotransferase (U/l) | 48.3 ± 6.0           | 71.3 ± 15.2*                                 |
| Alanine aminotransferase (U/l)   | 24.7 ± 2.6           | 24.9 ± 3.5                                   |
| Alkaline phosphatase (U/l)       | 375.4 ± 99.0         | 298.3 ± 30.9                                 |
| Blood glucose (mg/dl)            | 116.3 ± 22.4         | 127.7 ± 35.5                                 |
| Blood urea nitrogen (mg/dl)      | 37.7 ± 2.7           | 36.0 ± 4.6                                   |
| Creatinine (mg/dl)               | 0.2 ± 0.1            | 0.2 ± 0.1                                    |
| Total protein (g/dl)             | 4.6 ± 0.2            | 4.4 ± 0.3                                    |
| Albumin (g/dl)                   | 2.1 ± 0.2            | 2.0 ± 0.2                                    |
| Total bilirubin (mg/dl)          | 0.4 ± 0.1            | 0.4 ± 0.1                                    |
| Calcium (mg/dl)                  | 8.9 ± 0.2            | 8.3 ± 0.3*                                   |
| Inorganic phosphorus (mg/dl)     | 13.9 ± 1.5           | 13.7 ± 2.2                                   |
| Total cholesterol (mg/dl)        | 92.7 ± 14.5          | 54.3 ± 10.6*                                 |
| Triglycerides (mg/dl)            | 107.7 ± 10.5         | 54.3 ± 10.0*                                 |
| Na <sup>+</sup> (mEq/l)          | 153.0 ± 2.9          | 150.9 ± 1.1                                  |
| K <sup>+</sup> (mEq/l)           | 4.4 ± 0.8            | 3.6 ± 0.4                                    |
| Cl <sup>-</sup> (mEq/l)          | 119.1 ± 2.5          | 116.9 ± 2.7                                  |

Values are given as mean ± SD

\* P<0.05 compared with wild-type mice

**Supplementary Table 4.** Off-targets of *pX330-Hr51* vector

| Off-target candidate loci |                   | 12-bp PAM-proximal seed |
|---------------------------|-------------------|-------------------------|
| chr8: 109209355-109209369 | Off-target 1      | GTGAACGGCATTGGGG        |
|                           | Sequencing result | GTGAACGGCATTGGGG        |
| chr5: 20146003-20146017   | Off-target 2      | <u>CCT</u> CAATGCCGTTCA |
|                           | Sequencing result | CCTCAATGCCGTTCA         |
